# Supplementary material for: Enhancement of viral escape in HIV-1 Nef by STEP vaccination
Source: PubMed Central journal article supplement (PMC5051524; doi:10.1097/qad.0000000000001202), 2016-09-28
Supplement: aids-30-2449-s001.pdf [file aids-30-2449-s001.pdf]

| Subject                        | Number of Founder Variants | Estimated Days Post Infection | Number of sequences | Hamming Distances among Founder Variants | Goodness of Fit P Value <sup>#</sup> | Recombinant Removed |
|--------------------------------|----------------------------|-------------------------------|---------------------|------------------------------------------|--------------------------------------|---------------------|
| <b><u>Vaccine-Multiple</u></b> |                            |                               |                     |                                          |                                      |                     |
| 502-0227                       | 2                          | 13.0 [4.0 - 21.9]             | 6, 5                | 215                                      | 0.44                                 | None                |
| 502-0491 <sup>§</sup>          | 3                          | 10.5 [1.4 - 22.4]             | 3, 1, 1             | 301, 296, 11                             | 0.85                                 | None                |
| 502-0839 <sup>‡</sup>          | 2                          | 65.1 [43.9 - 86.3]            | 6, 4                | 65                                       | 0.18                                 | RH01, RH05          |
| 502-0961*                      | 2                          | 22.0 [13.2 - 30.7]            | 9, 1                | 67                                       | 0.99                                 | None                |
| 502-1174* <sup>‡</sup>         | 3                          | 34.7 [22.6 - 46.8]            | 2, 3, 3             | 69, 23, 92                               | 0.05                                 | FL04, FL11          |
| 502-1399                       | 4                          | 66.2 [36.1 - 96.4]            | 2, 1, 1, 1          | 35, 29, 26, 21, 19, 10                   | 0.06                                 | None                |
| 502-1619                       | 2                          | 60.6 [40.3 - 81.0]            | 8, 2                | 10                                       | 0.02                                 | None                |
| 502-2305 <sup>‡</sup>          | 5                          | 17.1 [7.6 - 26.7]             | 7, 2, 2, 1, 1       | 31, 30, 27, 24, 24, 21, 20, 18, 17, 16   | 0.15                                 | RH02                |
| <b><u>Placebo-Multiple</u></b> |                            |                               |                     |                                          |                                      |                     |
| 502-1504                       | 2                          | 33.9 [17.0 - 50.8]            | 7, 1                | 59                                       | 0.04                                 | None                |
| 502-1518                       | 2                          | 65.8 [44.5 - 87.1]            | 9, 1                | 20                                       | 0.05                                 | None                |

**Table SI. Shifted Poisson Mixture model (SPMM) estimates on STEP subjects with multiple founder infections.**

\*The left half of the genome was used. For all others, envelope sequences were used.

<sup>‡</sup> Recombinant sequences were removed

<sup>#</sup>Less than 0.05 implies statistically significant deviation from the SPMM.

<sup>§</sup>Subject with single strain infection from the phylogenetic method in reference 11 of the manuscript.

| Subject  | EVGFPPVRPQVPL (Nef <sub>65-76</sub> )          | RERMRRRAEP (Nef <sub>17-25</sub> )                                               | HPMSQHGIE (Nef <sub>166-174</sub> )                            | EDPEKEVLEWR (Nef <sub>174-184</sub> )                                                    |
|----------|------------------------------------------------|----------------------------------------------------------------------------------|----------------------------------------------------------------|------------------------------------------------------------------------------------------|
| 502-0062 | EVGFPPVRPQVPL (6 / 6)                          | RERMRRTRA (6 / 6)                                                                | HPISQHGMD (6 / 6)                                              | DDPEKEVLMWK (6 / 6)                                                                      |
| 502-0287 | EVGFPPVRPQVPL (3 / 3)                          | RERMRRRAEP (2 / 3)<br>RERMRRRAEP (1 / 3)                                         | HPMSQHGMD (3 / 3)                                              | DDPEKEVLQWK (3 / 3)                                                                      |
| 502-0309 | EVGFPPVKPQVPL (5 / 5)                          | RERMRRTRP (5 / 5)                                                                | HPLSQHGMD (5 / 5)                                              | DDPEKEVLQWK (5 / 5)                                                                      |
| 502-0341 | EVGFPPVRPQVPL (7 / 7)                          | RERMRRRAEP (7 / 7)                                                               | HPGSLHGMD (7 / 7)                                              | DDPEKEVLVWK (2 / 7)<br>DDPEKEVLVWK (4 / 7)<br>DDPEKEVLVWK (1 / 7)                        |
| 502-0524 | EVGFPPVRPQVPL (10 / 10)                        | RERIRRAAP (10 / 10)                                                              | HPLNTHGMD (10 / 10)                                            | DDPEKEVLVWR (10 / 10)                                                                    |
| 502-0648 | EVGFPPVRPQVPL (4 / 4)                          | RERMRRTEP (4 / 4)                                                                | HPMSLHGMD (3 / 4)<br>HPMSLHGMD (1 / 4)                         | DDPEREVLQWR (3 / 4)<br>DDPEREVLQWR (1 / 4)                                               |
| 502-0762 | EVGFPPVRPQVPL (1 / 9)<br>EVGFPPVRPQVPL (8 / 9) | REKMRRTGP (9 / 9)                                                                | HPMSLHGME (9 / 9)                                              | EDPEKEVLQWQ (9 / 9)                                                                      |
| 502-0823 | EVGFPPVRPQVPL (6 / 7)<br>EVGFPPVRPQV-L (1 / 7) | RERMRRTEP (7 / 7)                                                                | HPMSQHGMD (7 / 7)                                              | DDPEKEVLQWK (7 / 7)                                                                      |
| 502-0841 | EVGFPPVRPQVPL (2 / 4)<br>EVGFPPVRPQVPL (2 / 4) | RERMARAEP (4 / 4)                                                                | HPMSLHGME (1 / 4)<br>HPMSLHGMD (3 / 4)                         | DDPEREVLQWR (1 / 4)<br>DDPEREVLQWR (1 / 4)<br>DDPEREVLQWR (1 / 4)<br>DDPEREVLQWR (1 / 4) |
| 502-0879 | EVGFPPVKPQVPL (5 / 5)                          | RERMRRTRP (5 / 5)                                                                | HPLSQHGMD (5 / 5)                                              | DDPEKEVLQWR (3 / 5)<br>DDPEKEVLQWK (2 / 5)                                               |
| 502-0897 | EVGFPPVRPQVPL (10 / 10)                        | RERMRRARP (10 / 10)                                                              | HPMCQHGMD (3 / 10)<br>HPICQHGMD (6 / 10)<br>HPICQHGMD (1 / 10) | DDPEREVLQWK (9 / 10)<br>DDPEREVLQWK (1 / 10)                                             |
| 502-1046 | EVGFPPVKPQVPL (5 / 5)                          | RERMRRTEP (4 / 5)<br>RERMRR-EP (1 / 5)                                           | HPLSQHGID (5 / 5)                                              | DDPEKEVLVWK (5 / 5)                                                                      |
| 502-1055 | EVGFPPVRPQVPL (6 / 6)                          | RERMRRQTEP (6 / 6)                                                               | HPMSQHGID (6 / 6)                                              | DDPEREVLQWK (6 / 6)                                                                      |
| 502-1191 | EVGFPPVRPQVPL (5 / 5)                          | RDRMRRTP (5 / 5)                                                                 | HPGSLHGME (4 / 5)<br>HPGSLHGME (1 / 5)                         | EDPEKEVLVWR (5 / 5)                                                                      |
| 502-1211 | EVGFPPVRPQVPL (5 / 5)                          | RERMRRRAEP (5 / 5)                                                               | HPLNQHGM (5 / 5)                                               | DDPEREVLQWK (5 / 5)                                                                      |
| 502-1400 | EVGFPPVRPQVPL (5 / 5)                          | RERMRRQTRV (5 / 5)                                                               | HPMNQHGVD (5 / 5)                                              | DDPEREVLQWK (5 / 5)                                                                      |
| 502-1500 | EVGFPPVRPQVPL (4 / 4)                          | RERMRRRA-V (4 / 4)                                                               | HPISQHGMD (4 / 4)                                              | DDPEREVLQWK (4 / 4)                                                                      |
| 502-1512 | EVGFPPVRPQVPL (11 / 11)                        | RERMRRTEP (11 / 11)                                                              | HPMSLHGME (4 / 11)<br>HPMSLHGMD (7 / 11)                       | DDTEKEVLVWK (7 / 11)<br>DDTEKEVLVWK (4 / 11)                                             |
| 502-1897 | EVGFPPVRPQVPL (5 / 5)                          | RERMEQTEP (5 / 5)                                                                | HPLSQHGMD (5 / 5)                                              | DDPEREVLQWK (5 / 5)                                                                      |
| 502-1926 | EVGFPPVRPQVPL (8 / 8)                          | RERMRRRAEP (7 / 8)<br>RERMRRRAEP (1 / 8)                                         | HPMSQHGIE (8 / 8)                                              | EDPEREVLVWK (8 / 8)                                                                      |
| 502-2136 | EVGFPPVRPQVPL (5 / 5)                          | RERMRRRAEP (5 / 5)                                                               | HPMSLHGMD (5 / 5)                                              | DDPEKEVLQWK (5 / 5)                                                                      |
| 502-2241 | EVGFPPVRPQVPL (11 / 11)                        | RERMRRRAEP (11 / 11)                                                             | HPMSLHGMD (11 / 11)                                            | DDPEREVLQWK (11 / 11)                                                                    |
| 502-2254 | EVGFPPVRPQVPL (5 / 6)<br>EVGFPPVRPQVPL (1 / 6) | RERMEKTEP (6 / 6)                                                                | HPMSQHGVD (6 / 6)                                              | DDSEREVLQWK (6 / 6)                                                                      |
| 502-2289 | DVGFPPVRPQVPL (5 / 5)                          | RERMEKTEP (3 / 5)<br>R-RMEKTEP (1 / 5)<br>R-RMEKTEP (1 / 5)                      | HPMNLHGMD (5 / 5)                                              | DDPEREVLQWR (5 / 5)                                                                      |
| 502-2349 | EVGFPPVRPQVPL (4 / 4)                          | RDRMRRRAEP (4 / 4)                                                               | HPMSQHGMD (4 / 4)                                              | DDPEKEVLMWK (4 / 4)                                                                      |
| 502-2437 | EVGFPPVRPQVPL (10 / 10)                        | RDRMKRAEP (10 / 10)                                                              | HPINQHGMD (10 / 10)                                            | DDPEREVLQWK (10 / 10)                                                                    |
| 502-2649 | EVGFPPVRPQVPL (6 / 9)<br>EVGFPIRPQVPL (3 / 9)  | RERIRRTTP (5 / 9)<br>RDRIRRTTP (1 / 9)<br>RDRIRRTTP (1 / 9)<br>RDRIRRTTP (1 / 9) | HPMNQHGID (8 / 9)<br>HPMNQHGID (1 / 9)                         | DDPEREVLVWK (9 / 9)                                                                      |
| 502-2696 | EVGFPPVRPQVPL (5 / 6)<br>EVGFPPVRPQVPL (1 / 6) | REKMRQHPP (6 / 6)                                                                | HPICQHGME (6 / 6)                                              | EDADRDVLVWR (6 / 6)                                                                      |
| 502-2717 | EVGFPPVRPQVPL (7 / 7)                          | RDRMRRAPA (7 / 7)                                                                | HPANQHGVD (7 / 7)                                              | DDPEKEVLMWK (7 / 7)                                                                      |

**Table SII. Four Nef epitope sequences of 29 STEP vaccinees whose infections were estimated to originate from single founder variant.**

| Subject  | EVGFPVVRPQVPL (Nef <sub>65-76</sub> )            | RERMRAEP (Nef <sub>17-25</sub> ) | HPMSQHIE (Nef <sub>166-174</sub> )                          | EDPEKEVLEWR (Nef <sub>174-184</sub> )      |
|----------|--------------------------------------------------|----------------------------------|-------------------------------------------------------------|--------------------------------------------|
| 502-0053 | EVGFPVKPQVPL (10 / 10)                           | RERMRAEP (10 / 10)               | HPASLHGMD (10 / 10)                                         | DDPEREVLVWK (10 / 10)                      |
| 502-0176 | EVGFPVVRPQVPL (11 / 11)                          | RERMKRAEP (11 / 11)              | HPMSLHGMD (11 / 11)                                         | DDTEREVLQWK (11 / 11)                      |
| 502-0322 | DVGFPVVRPQVPL (5 / 5)                            | REKMKRTEP (5 / 5)                | HPMSLHGME (5 / 5)                                           | EDPEKEVLVWR (5 / 5)                        |
| 502-0346 | EVGFPVVRPQVPL (9 / 9)                            | RERMRAEP (9 / 9)                 | HPMSQHGM (9 / 9)                                            | DDPEKEVLMWK (9 / 9)                        |
| 502-0364 | EVGFPVVRPQVPL (5 / 5)                            | RERMRRARP (5 / 5)                | HPLSQHGMD (5 / 5)                                           | DDPEKEVLVWK (5 / 5)                        |
| 502-0388 | EVGFPVKPQVPL (9 / 9)                             | RERMRAEP (9 / 9)                 | HPMAQHGM (9 / 9)                                            | DDPEKEVLMWK (9 / 9)                        |
| 502-0525 | EVGFPVKPQVPL (5 / 5)                             | RDRMRAEP (5 / 5)                 | HPMSQHGM (5 / 5)                                            | DDPEKEVLIWK (5 / 5)                        |
| 502-0572 | EVGFPVVRPQVPL (5 / 5)                            | RERMERAEP (5 / 5)                | HPMSLHGAE (5 / 5)                                           | EDPEKEVLMWK (5 / 5)                        |
| 502-0717 | EVGFPVTPQVPV (6 / 6)                             | RERMERTEP (6 / 6)                | HPMSLHGME (6 / 6)                                           | EDTEGEVLQWR (5 / 6)<br>EDTEGEV-QWR (1 / 6) |
| 502-0923 | EVGFPVVRPQVPL (8 / 8)                            | RERMRRTEP (8 / 8)                | HPMSQHGM (8 / 8)                                            | DDPEKEVLEWR (8 / 8)                        |
| 502-0938 | EVGFPVKPQVPL (10 / 10)                           | RERMQRTEP (10 / 10)              | HPVSLHGME (10 / 10)                                         | EDPEGEVLMWK (10 / 10)                      |
| 502-1027 | EVGFPVVRPQVPL (9 / 10)<br>EVG-PVVRPQVPL (1 / 10) | RERIRRAEP (10 / 10)              | HPICQHGM (8 / 10)<br>HPIC-HGM (1 / 10)<br>HPICQHGT (1 / 10) | DDPEREVLVWR (10 / 10)                      |
| 502-1047 | EVGFPVVRPQVPL (5 / 5)                            | RDRMRRAPA (5 / 5)                | HPMSQHGM (5 / 5)                                            | DDPEKEVLMWK (5 / 5)                        |
| 502-1478 | EVGFPVTPQVPL (5 / 5)                             | RERMRAEP (5 / 5)                 | HPMSQHGM (5 / 5)                                            | DDPEKEVLMWK (5 / 5)                        |
| 502-1799 | EVGFPVVRPQVPL (5 / 5)                            | KEKMKRTDP (5 / 5)                | HPMNQHGM (5 / 5)                                            | DDPEREVLVWK (5 / 5)                        |
| 502-2495 | EVGFPVVRPQVPL (3 / 3)                            | RERMRAEP (3 / 3)                 | HPVNLHGMD (3 / 3)                                           | DDPEKEVLQWK (3 / 3)                        |
| 502-2586 | EVGFPVVRPQVPL (6 / 6)                            | RERMRAEP (6 / 6)                 | HPMSLHGME (6 / 6)                                           | EDPEREVLQWK (5 / 6)<br>EDPEGEVLQWK (1 / 6) |
| 502-2622 | EVGFPVVRPQVPL (5 / 5)                            | RKRMKQTEP (5 / 5)                | HPISQHGM (5 / 5)                                            | DDPEREVLQWK (5 / 5)                        |
| 502-2667 | EVGFPVVRPQVPL (5 / 5)                            | RERMRRTEP (5 / 5)                | QPMSRHGM (5 / 5)                                            | DDPEKEVLVWK (5 / 5)                        |
| 502-2794 | DVGFPVVRPQVPL (5 / 5)                            | RDRMRAEP (5 / 5)                 | HPINQHGM (5 / 5)                                            | DDPEKEVLMWQ (5 / 5)                        |

**Table III. Four Nef epitope sequences of 20 STEP placebo-treated subjects whose infections were estimated to originate from single founder variant.**
